# Supplementary material
Source: PubMed Central journal article supplement (PMC7727256)
Supplement: 12909_2020_2339_MOESM2_ESM.pdf [file 12909_2020_2339_MOESM2_ESM.pdf]

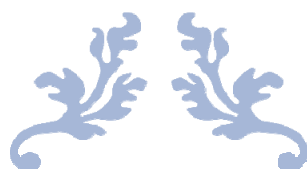

---

## 医生职业特征调查问卷（患者版）

---

填写日期： 2019 年 月 日

填写时间： 上午○

下午○

问卷填写人： 患者本人○

患者家属○

医护人员○

问卷编号： \_\_\_\_\_

所在科室： 内科系统○外科系统○

(由项目成员数据输入时填写)

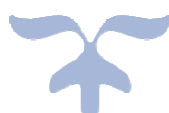

2019年9-11月

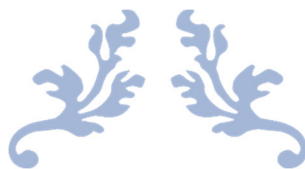

---

## 医生职业特征调查问卷（患者版）

---

填写日期： 2019 年 月 日

填写时间： 上午○

下午○

问卷填写人： 患者本人○

患者家属○

医护人员○

问卷编号： \_\_\_\_\_

所在科室： 内科系统○外科系统○

(由项目成员数据输入时填写)

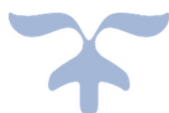

2019 年 9-11 月

山东第一医科大学第一附属医院（山东省千佛山医院）

## 参与研究同意书

我已经阅读并了解整个研究的相关内容。在回答问卷前，问卷调查员给予我提问的机会，我提出的所有问题均已得到解答。我知道该项调查是完全自愿与义务性的。可以在任何时候退出问卷调查。

**当我开始填写问卷时，代表我**

1. 同意参与该项调查
2. 同意我提供在问卷里的信息可以用于撰写论文、演讲或学术期刊文章。而且我知道我的个人信息不会因此被泄露。

希望我提供的信息能够对该研究或日后的相关研究有所帮助。

**一、 选择题**  
(除第 8 题外, 请只选择一个答案)

**1、 性别**

- 男
- 女

**2、 居住地**

- 农村
- 乡镇
- 城市(县城及以上)

**3、 年龄**

- 17 岁及以下
- 18 岁—34 岁
- 35 岁—54 岁
- 55 岁—59 岁
- 60 岁及以上

**4、 教育程度**

- 小学及以下
- 初中
- 高中
- 本科/大专
- 研究生及以上

**5、 您目前或退休前的工作性质是**

- 医务人员
- 非医务人员
- 无业者

**6、 选择医生的方式**

- 网上查询
- 亲友推荐
- 随机挂号
- 曾经就诊或熟悉的医生

**7、 您个人税前年收入(元)**

- 1 万以下
- 1 万—5 万
- 5 万以上

**8、 诊疗过程中, 影响您对诊疗服务满意度的主要因素(最多选择 3 项)**

- 就诊硬件环境
- 医疗效果
- 医护人员态度
- 医护人员仪容
- 就医流程便利程度
- 诊疗时间的长短

9、在过去的诊疗经历中，您是否觉得医生要求做的辅助检查是不必要的。

- 是
- 否

10、您认为医生要求做不必要的辅助检查的原因是

- 医生经验不足
- 医院经营目标要求
- 医生自我保护意识（虽然他们经验足够）

11、如果您或亲朋好友有过重病经历时，医生是如何履行病情告知义务的？

- 医务人员必须如实告知病人病情
- 医务人员暂不告知病人，而是先与患者亲属商量
- 医务人员根据实际情况处理
- 没有这种经历

12、根据您或亲朋好友的经历，当发生医患纠纷时，首先介入调查的是哪一项？

- 政府卫生主管部门
- 医疗行业协会
- 所在医院
- 媒体报道
- 没有这种经历

## 二 量表选择题

题 13-26，请您根据‘5级量表’做出选择，如实反映过去就诊经历的实际情况

- 1 从来没有（代表出现频率约 0%）
- 2 极少（代表出现频率约 25%）
- 3 中立（代表出现频率约 50%）
- 4 经常（代表出现频率约 75%）
- 5 总是（代表出现频率约 100%）

|    | 问题                          | 1 | 2 | 3 | 4 | 5 |
|----|-----------------------------|---|---|---|---|---|
| 13 | 过去就诊过程中，医生决定检查检验时，征求过您的意见。  | 1 | 2 | 3 | 4 | 5 |
| 14 | 过去就诊过程中，医生决定治疗方案时，征求过您的意见。  | 1 | 2 | 3 | 4 | 5 |
| 15 | 过去就诊过程中，医生赢得了您信任。           | 1 | 2 | 3 | 4 | 5 |
| 16 | 过去就诊过程中，医生询问与疾病相关的隐私问题让您反感。 | 1 | 2 | 3 | 4 | 5 |

请在所要选择的答案的对应数字上打√

|    |                                       |   |   |   |   |   |
|----|---------------------------------------|---|---|---|---|---|
| 17 | 过去就诊过程中，医生检查与疾病相关的隐私部位让您反感。           |   |   |   |   |   |
| 18 | 过去就诊过程中，医生都会用足够的时间询问病情。               | 1 | 2 | 3 | 4 | 5 |
| 19 | 过去就诊过程中，医生要求做了不必要的检查检验。               | 1 | 2 | 3 | 4 | 5 |
| 20 | 过去就诊过程中，医生会耐心解释繁杂的诊疗过程。               | 1 | 2 | 3 | 4 | 5 |
| 21 | 过去就诊过程中，医生对每一位患者都同样关心、照顾。             | 1 | 2 | 3 | 4 | 5 |
| 22 | 过去就诊过程中，医生都会传授预防疾病、维护健康的知识            | 1 | 2 | 3 | 4 | 5 |
| 23 | 医生介绍病情时，经常使用难以明白的医学术语。                | 1 | 2 | 3 | 4 | 5 |
| 24 | 过去就诊过程中，当遇到不明白的医学术语时，医生都能用通俗易懂语言解释清楚。 | 1 | 2 | 3 | 4 | 5 |
| 25 | 过去的诊疗过程中，我对医生是尊重的。                    | 1 | 2 | 3 | 4 | 5 |
| 26 | 根据您的亲朋好友的经历，医生会事先解释诊疗过程中病情恶化的可能性      | 1 | 2 | 3 | 4 | 5 |

**题 27-35， 请您根据‘5级量表’做出选择，如实反映过去就诊经历的情况**

- 1 完全不同意 (代表同意程度约 0%)
- 2 少部分同意 (代表同意程度约 25%)
- 3 中立 (代表同意程度约 50%)
- 4 大部分同意 (代表同意程度约 75%)
- 5 完全同意 (代表同意程度约 100%)

|    |                        |   |   |   |   |   |
|----|------------------------|---|---|---|---|---|
| 27 | 医生是高风险的职业。             | 1 | 2 | 3 | 4 | 5 |
| 28 | 医生是工作量繁重的职业。           | 1 | 2 | 3 | 4 | 5 |
| 29 | 医生是培养时间长、技术含量高的职业。     | 1 | 2 | 3 | 4 | 5 |
| 30 | 医生是高收入阶层。              | 1 | 2 | 3 | 4 | 5 |
| 31 | 患者有权在诊疗过程进行录音、录像。      | 1 | 2 | 3 | 4 | 5 |
| 32 | 患者给医生送礼是为了得到更好的诊疗。     | 1 | 2 | 3 | 4 | 5 |
| 33 | 过去的医疗经历让我对医生的看法变好。     | 1 | 2 | 3 | 4 | 5 |
| 34 | 现在患者医学知识的提高促使医生更加严谨细致。 | 1 | 2 | 3 | 4 | 5 |
| 35 | 当出现医患纠纷时，医院能客观地调查解决。   | 1 | 2 | 3 | 4 | 5 |

**问卷到此结束，感谢您的参与！请把问卷放进问卷收集箱里**

## Patient's questionnaire

A. Multiple Choice Questions (Please choose only one answer for each question except Question 8)

1. Gender
  - Male
  - Female
2. Residence
  - Rural area
  - Regional area
  - Metropolitan
3. Age
  - 17 years old or below
  - 18-34 years old
  - 35-54 years old
  - 55-59 years old
  - 60 years old or above
4. Education
  - Primary school or below
  - Secondary school
  - Senior secondary school
5. Occupation: current or before retirement
  - Clinical position
  - Non-clinical position
  - Unemployed
6. The way to choose doctors
  - Online searching
  - Recommendation from family or friends
  - Random booking
  - Previous or familiar doctors
7. Your annual income before tax
  - Below 10,000 RMB
  - 10,000-50,000 RMB
  - Above 50,000 RMB
8. During the treatment process, what are the main factors that could affect your satisfaction with the medical service? (You can maximally choose three options)
  - Hospital environment
  - Medical treatment effect
  - Medical staff attitude
  - Medical staff appearance
  - Convenience of the treatment process
  - Duration of the diagnosis and treatment process
9. In your previous experience, did you think the assisted tests required by the doctors was unnecessary?
  - Yes
  - No
10. In your opinion, what is the reason that doctors require patients to do the unnecessary assisted tests?
  - Doctors do not have enough experience
  - Generating profit for the hospital

Doctors' self-protect act (even when with adequate experience)

11. If you or your family were ever in critical condition, how did the doctor inform patients of the condition?

- Medical staff inform patients of the actual condition
- Medical staff discussed the condition with patients' family first without informing the patients
- Medical staff will decide how to act on case to case basis
- I don't have this kind of experience

12. According to your or your family experience, when there was dispute between a doctor-patient, which of the following should take place first?

- Government health authority
- Medical industry association
- Hospital
- Media report
- I don't have this kind of experience

### B. 5-point Likert Scale Questions

Based on your past diagnosis and treatment experience, use the 5-point Likert Scale to complete Question 13-26.

- 1 Never
- 2 Rarely
- 3 Sometimes
- 4 Often
- 5 Always

|    | Question                                                                                                                                              | 1 | 2 | 3 | 4 | 5 |
|----|-------------------------------------------------------------------------------------------------------------------------------------------------------|---|---|---|---|---|
| 13 | In the previous diagnostic and treatment process, doctors sought my permission before deciding to perform medical check up and test                   | 1 | 2 | 3 | 4 | 5 |
| 14 | In the previous diagnostic and treatment process, doctors sought my permission before deciding the medical treatment plan.                            | 1 | 2 | 3 | 4 | 5 |
| 15 | In the previous diagnostic and treatment process, doctors earned my trust.                                                                            | 1 | 2 | 3 | 4 | 5 |
| 16 | In the previous diagnostic and treatment process, I disliked that doctors asked me questions related to the illness that are private and confidential | 1 | 2 | 3 | 4 | 5 |
| 17 | In the previous diagnostic and treatment process, I disliked when the doctor examined my private body parts that are                                  |   |   |   |   |   |



请在所要选择的答案的对应数字上打√

|    |                                                                                                                                                                                                             |   |   |   |   |   |
|----|-------------------------------------------------------------------------------------------------------------------------------------------------------------------------------------------------------------|---|---|---|---|---|
|    | relevant to the illness.                                                                                                                                                                                    |   |   |   |   |   |
| 18 | In the previous diagnostic and treatment process, doctors spent enough time asking me about the condition.                                                                                                  | 1 | 2 | 3 | 4 | 5 |
| 19 | In the previous diagnostic and treatment process, doctors asked me to go through unnecessary examination and tests                                                                                          | 1 | 2 | 3 | 4 | 5 |
| 20 | In the previous diagnostic and treatment process, doctors patiently explained the complex diagnosis and treatment process to me.                                                                            | 1 | 2 | 3 | 4 | 5 |
| 21 | In the previous diagnostic and treatment process, doctors showed the same level of care to each of their patients                                                                                           | 1 | 2 | 3 | 4 | 5 |
| 22 | In the previous diagnostic and treatment process, doctors taught me how to maintain health and prevent disease.                                                                                             | 1 | 2 | 3 | 4 | 5 |
| 23 | Doctors often use medical terms which are hard to understand to explain the condition to me                                                                                                                 | 1 | 2 | 3 | 4 | 5 |
| 24 | In the previous diagnostic and treatment process, doctors were able to use simple language to explain medical terminologies that I could not understand                                                     | 1 | 2 | 3 | 4 | 5 |
| 25 | In the previous diagnostic and treatment process, I showed doctors my respect                                                                                                                               | 1 | 2 | 3 | 4 | 5 |
| 26 | Based on my own experience or experience of my family members, doctors explained the possibility of adverse outcome/prognosis that we may encountered during the diagnosis and treatment process in advance | 1 | 2 | 3 | 4 | 5 |

Based on your past diagnosis and treatment experience, use the 5-point Likert Scale to complete Question 27-35.

- 1 Strongly disagree
- 2 Disagree
- 3 Either agree or disagree
- 4 Agree
- 5 Strongly agree

|    |                                                                                                           |   |   |   |   |   |
|----|-----------------------------------------------------------------------------------------------------------|---|---|---|---|---|
| 27 | Doctor is a high-risk profession                                                                          | 1 | 2 | 3 | 4 | 5 |
| 28 | Doctors have heavy workload that is very complex                                                          | 1 | 2 | 3 | 4 | 5 |
| 29 | Doctor is a profession with high level skill requirements which take a long process to develop            | 1 | 2 | 3 | 4 | 5 |
| 30 | Doctors' income are high                                                                                  | 1 | 2 | 3 | 4 | 5 |
| 31 | Patients have the right to record the diagnostic and treatment process.                                   | 1 | 2 | 3 | 4 | 5 |
| 32 | The reason for patients give gifts to doctors gifts is to receive better diagnosis and medical treatment. | 1 | 2 | 3 | 4 | 5 |

请在所要选择的答案的对应数字上打√

---

|    |                                                                                                        |   |   |   |   |   |
|----|--------------------------------------------------------------------------------------------------------|---|---|---|---|---|
| 33 | My previous experiences have positively changed my regards to doctors                                  | 1 | 2 | 3 | 4 | 5 |
| 34 | The improved medical knowledge of patients has pressured doctors act more rigorous.                    | 1 | 2 | 3 | 4 | 5 |
| 35 | When a doctor-patient dispute occurs, the hospital can investigate and resolve the issues objectively. | 1 | 2 | 3 | 4 | 5 |

问卷到此结束，感谢您的参与！请把问卷放进问卷收集箱里

This is the end of the questionnaire. Thank you for your participation. Please put the questionnaire into collection box.
